# Supplementary material
Source: publisher site journal article supplement (https://www.spandidos-publications.com/2999/downloadSupplementary)

Figure S1. Western blot analysis of NUMB protein expression. Western blot was used to detect the expression levels of NUMB in the pcDNA3.1 and pcDNA3.1 + NUMB groups.

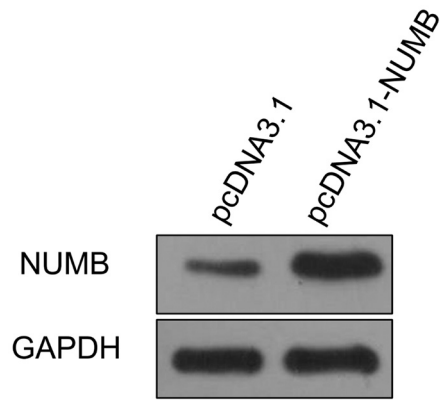

Supplement: Supplementary file 1 [file downloadSupplementary]
